# Supplementary material for: Future Ocean warming may prove beneficial for the northern population of European seabass, but ocean acidification does not
Source: Oxford University Press journal article supplement (doi:10.1242/jeb.213017), 2019-01-01
Supplement: jeb213017supp.pdf [file jeb213017supp.pdf]

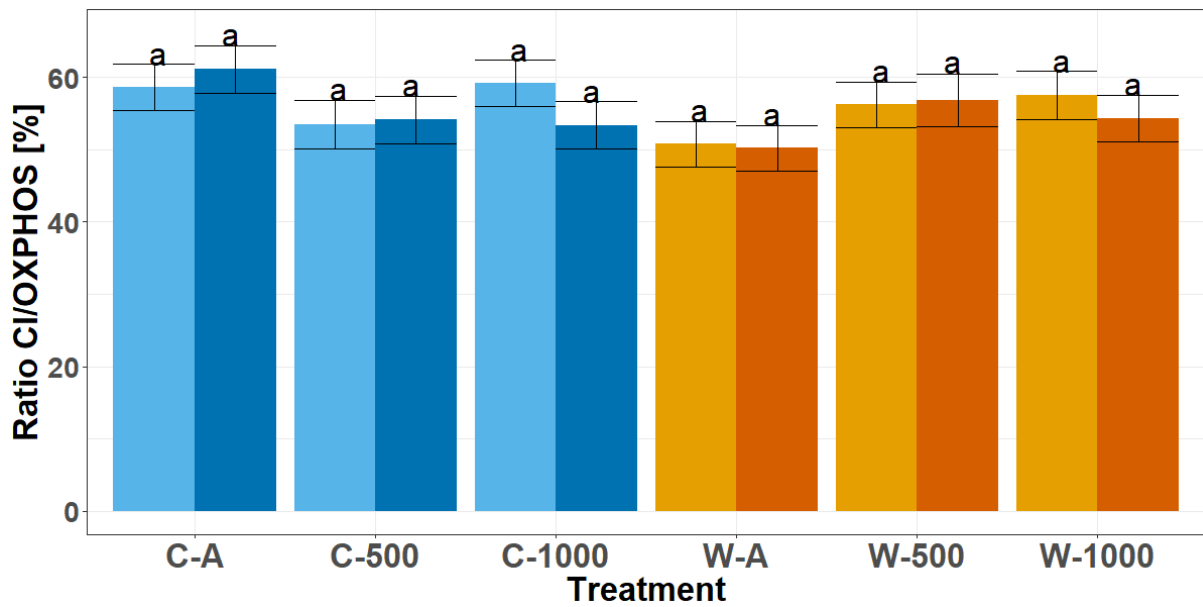

Figure S1 Ratio of CI respiration over OXPPOS respiration of permeabilized heart ventricle fibers of European seabass (expressed as percentage). Shown are  $\bar{x} \pm \text{s.e.m.}$  Different letters indicate significant differences (LME,  $p < 0.05$ ); blue: cold life conditioned fish (C), orange: warm life conditioned fish (W), light color: cold assay temperature, dark color: warm assay temperature, A: Ambient  $\text{PCO}_2$ , 500: ambient + 500  $\mu\text{atm CO}_2$ , 1000: ambient + 1000  $\mu\text{atm CO}_2$ ;  $n_{\text{C-A}}=16/14$ ,  $n_{\text{C-500}}=14/16$ ,  $n_{\text{C-1000}}=16/15$ ,  $n_{\text{W-A}}=16/14$ ,  $n_{\text{W-500}}=17/10$ ,  $n_{\text{W-1000}}=13/14$ , for cold/warm assay temperature respectively.

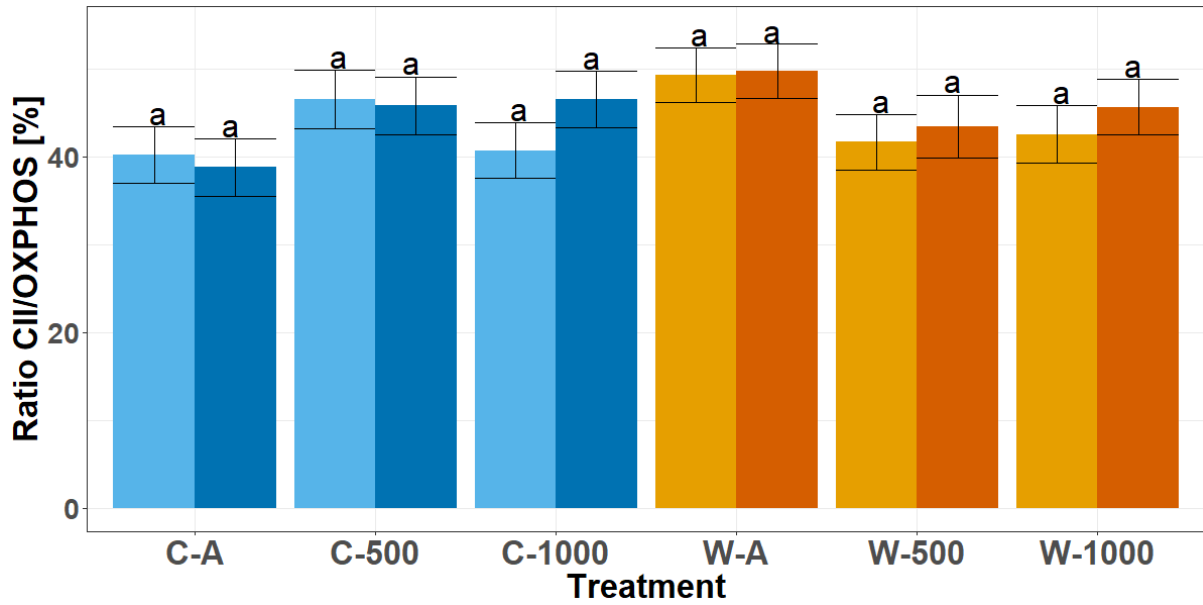

Figure S2 Ratio of CII respiration over OXPPOS respiration of permeabilized heart ventricle fibers of European seabass (expressed as percentage). Shown are  $\bar{x} \pm \text{s.e.m.}$ . Different letters indicate significant differences (LME,  $p < 0.05$ ); blue: cold life conditioned fish (C), orange: warm life conditioned fish (W), light color: cold assay temperature, dark color: warm assay temperature, A: Ambient  $\text{PCO}_2$ , 500: ambient + 500  $\mu\text{atm CO}_2$ , 1000: ambient + 1000  $\mu\text{atm CO}_2$ ;  $n_{\text{C-A}}=15/14$ ,  $n_{\text{C-500}}=14/16$ ,  $n_{\text{C-1000}}=16/15$ ,  $n_{\text{W-A}}=15/14$ ,  $n_{\text{W-500}}=16/10$ ,  $n_{\text{W-1000}}=13/14$ , for cold/warm assay temperature respectively.

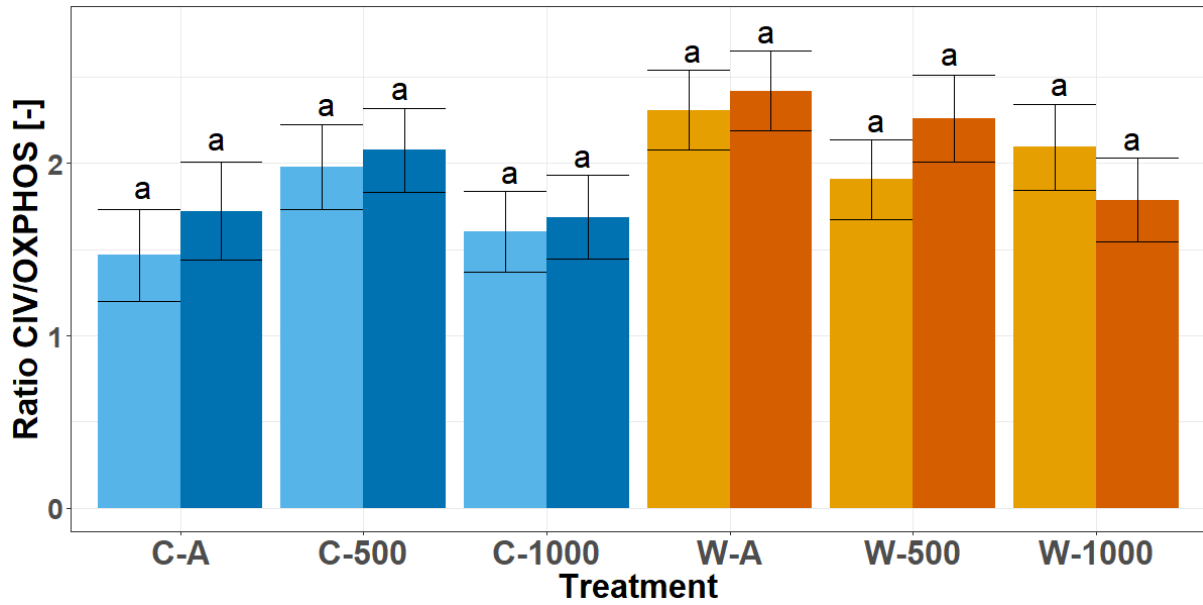

Figure S3 Ratio of CIV capacities over OXPPOS respiration of permeabilized heart ventricle fibers of European seabass (expressed as percentage). Shown are  $\bar{x} \pm \text{s.e.m.}$ . Different letters indicate significant differences (LME,  $p < 0.05$ ); blue: cold life conditioned fish (C), orange: warm life conditioned fish (W), light color: cold assay temperature, dark color: warm assay temperature, A: Ambient  $\text{PCO}_2$ , 500: ambient + 500  $\mu\text{atm CO}_2$ , 1000: ambient + 1000  $\mu\text{atm CO}_2$ ;  $n_{\text{C-A}}=11/10$ ,  $n_{\text{C-500}}=14/16$ ,  $n_{\text{C-1000}}=15/15$ ,  $n_{\text{W-A}}=15/13$ ,  $n_{\text{W-500}}=17/11$ ,  $n_{\text{W-1000}}=11/13$ , for cold/warm assay temperature respectively.

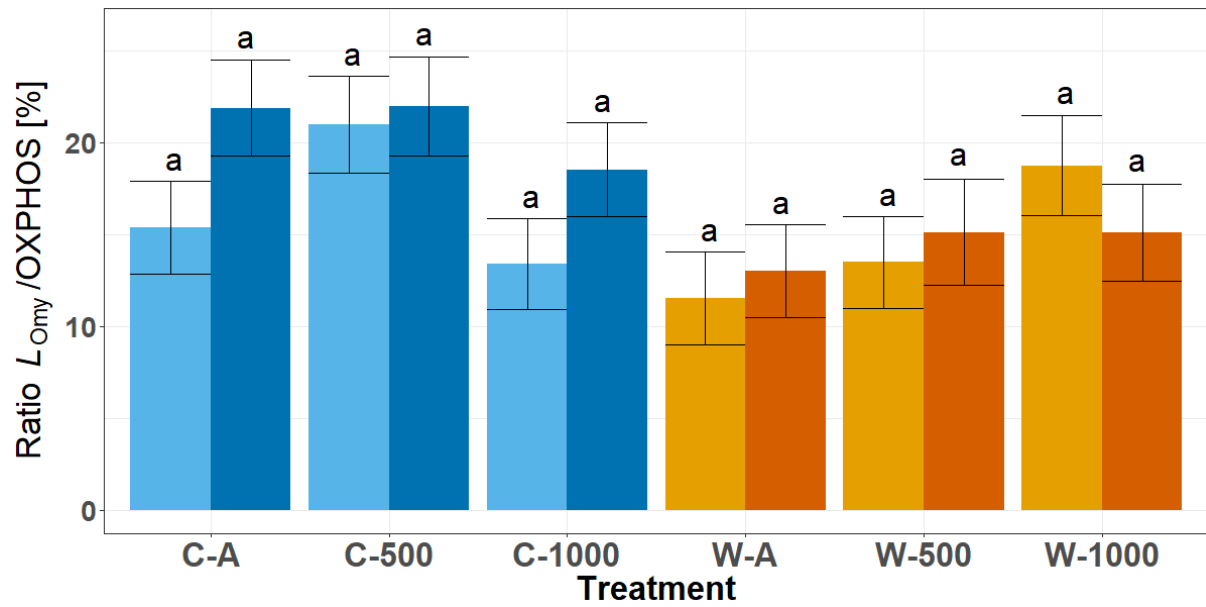

Figure S4 Ratio of  $L_{omy}$  respiration over OXPPOS respiration ( $L_{omy}$  -fraction) of permeabilized heart ventricle fibers of European seabass (expressed as percentage). Shown are  $\bar{x} \pm s.e.m.$  Different letters indicate significant differences (LME,  $p < 0.05$ ); blue: cold life conditioned fish (C), orange: warm life conditioned fish (W), light color: cold assay temperature, dark color: warm assay temperature, A: Ambient  $PCO_2$ , 500: ambient + 500  $\mu\text{atm } CO_2$ , 1000: ambient + 1000  $\mu\text{atm } CO_2$ ;  $n_{C-A}=15/14$ ,  $n_{C-500}=15/15$ ,  $n_{C-1000}=16/16$ ,  $n_{W-A}=16/15$ ,  $n_{W-500}=17/11$ ,  $n_{W-1000}=13/14$ , for cold/warm assay temperature respectively.

**Table S1 Light intensity during larval phase**

|                       |   |     |   |    |    |    |    |    |    |    |
|-----------------------|---|-----|---|----|----|----|----|----|----|----|
| Age [d]               | 2 | 7   | 9 | 12 | 16 | 20 | 27 | 31 | 36 | 44 |
| Light intensity [lux] | 0 | 0-1 | 1 | 2  | 5  | 7  | 10 | 31 | 59 | 96 |

**Table S2 Larval mortality in % in the different larval rearing tanks (n=3); A – Ambient  $PCO_2$ ,  $\Delta 500$  – ambient + 500  $\mu atm$   $CO_2$ ,  $\Delta 1000$  – ambient + 1000  $\mu atm$   $CO_2$ , T – temperature, Rep 1-3 – replicate tank 1-3.**

| T [°C] | A     |       |       | $\Delta 500$ |       |       | $\Delta 1000$ |       |       |
|--------|-------|-------|-------|--------------|-------|-------|---------------|-------|-------|
|        | Rep 1 | Rep 2 | Rep 3 | Rep 1        | Rep 2 | Rep 3 | Rep 1         | Rep 2 | Rep 3 |
| 15     | 31.5  | 37.3  | 25.9  | 78.6         | 21.9  | 33.3  | 35.6          | 11.3  | 16.8  |
| 20     | 43.5  | 29.4  | 30.5  | 46.6         | 33.6  | 34.9  | 39.6          | 26.7  | 35.7  |

**Table S3 Juvenile mortality in % in the different tanks (n=1); A: Ambient  $P$   $CO_2$ ,  $\Delta 500$ : ambient + 500  $\mu atm$   $CO_2$ ,  $\Delta 1000$ : ambient + 1000  $\mu atm$   $CO_2$ , T: temperature**

| T [°C] | A    | $\Delta 500$ | $\Delta 1000$ |
|--------|------|--------------|---------------|
| 15     | 24.8 | 43.4         | 29.7          |
| 20     | 35.2 | 41.7         | 38.2          |

**Table S4** Biometrical data of fish used for mitochondrial respiration: AT: assay temperature, Treatments: C: cold life condition (up to 18°C), W: warm life condition (up to 23°C), A: ambient  $PCO_2$ ,  $\Delta 500$ : ambient  $PCO_2 + 500 \mu atm$ ,  $\Delta 1000$ : ambient  $PCO_2 + 1000 \mu atm$ , HSI: hepatosomatic index, K: condition factor, values are means  $\pm$  standard error.

| Treatment         | AT [°C] | n  | Ventricle weight [g] | Carcass weight [g] | Body length [mm] | HSI [-]         | K [-]           |
|-------------------|---------|----|----------------------|--------------------|------------------|-----------------|-----------------|
| C – A             | 15      | 16 | 0.0114 $\pm$ 0.0008  | 10.04 $\pm$ 0.78   | 87.21 $\pm$ 1.96 | 1.44 $\pm$ 0.10 | 1.46 $\pm$ 0.05 |
| C – $\Delta 500$  | 15      | 15 | 0.0101 $\pm$ 0.0006  | 10.59 $\pm$ 0.67   | 88.83 $\pm$ 2.14 | 1.37 $\pm$ 0.09 | 1.50 $\pm$ 0.05 |
| C – $\Delta 1000$ | 15      | 16 | 0.0102 $\pm$ 0.0007  | 9.92 $\pm$ 0.62    | 86.12 $\pm$ 1.88 | 1.45 $\pm$ 0.12 | 1.53 $\pm$ 0.03 |
| C – A             | 20      | 16 | 0.0108 $\pm$ 0.0009  | 9.97 $\pm$ 0.84    | 85.22 $\pm$ 2.46 | 1.41 $\pm$ 0.06 | 1.56 $\pm$ 0.03 |
| C – $\Delta 500$  | 20      | 16 | 0.0104 $\pm$ 0.0009  | 10.32 $\pm$ 0.85   | 88.28 $\pm$ 2.39 | 2.00 $\pm$ 0.42 | 1.46 $\pm$ 0.04 |
| C – $\Delta 1000$ | 20      | 16 | 0.0102 $\pm$ 0.0007  | 10.28 $\pm$ 0.81   | 87.69 $\pm$ 2.01 | 1.82 $\pm$ 0.17 | 1.49 $\pm$ 0.04 |
| W – A             | 15      | 17 | 0.0122 $\pm$ 0.0007  | 13.75 $\pm$ 0.86   | 97.58 $\pm$ 1.81 | 2.39 $\pm$ 0.13 | 1.46 $\pm$ 0.02 |
| W – $\Delta 500$  | 15      | 18 | 0.0147 $\pm$ 0.0011  | 14.99 $\pm$ 1.12   | 98.37 $\pm$ 2.31 | 2.35 $\pm$ 0.12 | 1.53 $\pm$ 0.02 |
| W – $\Delta 1000$ | 15      | 13 | 0.0123 $\pm$ 0.0007  | 13.46 $\pm$ 0.88   | 96.14 $\pm$ 2.25 | 2.53 $\pm$ 0.11 | 1.49 $\pm$ 0.02 |
| W – A             | 20      | 16 | 0.0104 $\pm$ 0.0007  | 11.32 $\pm$ 0.71   | 91.88 $\pm$ 1.85 | 2.28 $\pm$ 0.13 | 1.43 $\pm$ 0.02 |
| W – $\Delta 500$  | 20      | 11 | 0.0125 $\pm$ 0.0009  | 13.23 $\pm$ 0.82   | 95.13 $\pm$ 1.80 | 2.49 $\pm$ 0.10 | 1.52 $\pm$ 0.03 |
| W – $\Delta 1000$ | 20      | 16 | 0.0129 $\pm$ 0.0013  | 13.83 $\pm$ 1.17   | 97.00 $\pm$ 2.59 | 2.44 $\pm$ 0.09 | 1.46 $\pm$ 0.02 |
